# Supplementary material for: Altered localization of nucleoporin 98 in primary tauopathies
Source: PubMed Central journal article supplement (PMC9806717; doi:10.1093/braincomms/fcac334), 2022-12-22
Supplement: fcac334_supplementary_data.pdf [file fcac334_supplementary_data.pdf]

## Altered Localization of Nucleoporin 98 in Primary Tauopathies

### Supplementary Data

**Supplementary Table 1. Evaluation of Potential Confounding Variables.**

| <b>Variable</b> | <b>Brain Region</b> | <b>Outcome</b>               | <b>Statistical Test</b> | <b>p-value</b> |
|-----------------|---------------------|------------------------------|-------------------------|----------------|
| Age at death    | Frontal cortex      | % Abnormal nuclear NUP98     | Spearman correlation    | 0.1747         |
| Age at death    | Frontal cortex      | % Abnormal cytoplasmic NUP98 | Spearman correlation    | 0.4242         |
| Age at death    | Occipital cortex    | % Abnormal nuclear NUP98     | Spearman correlation    | 0.6702         |
| Age at death    | Occipital cortex    | % Abnormal cytoplasmic NUP98 | Spearman correlation    | 0.5180         |
| Age at death    | NA                  | Diagnosis                    | Kruskal-Wallis test     | 0.6571         |
| PMI             | Frontal cortex      | % Abnormal nuclear NUP98     | Spearman correlation    | 0.9623         |
| PMI             | Frontal cortex      | % Abnormal cytoplasmic NUP98 | Spearman correlation    | 0.7691         |
| PMI             | Occipital cortex    | % Abnormal nuclear NUP98     | Spearman correlation    | 0.5386         |
| PMI             | Occipital cortex    | % Abnormal cytoplasmic NUP98 | Spearman correlation    | 0.3460         |
| PMI             | NA                  | Diagnosis                    | Kruskal-Wallis test     | 0.7511         |
| Sex             | Frontal cortex      | % Abnormal nuclear NUP98     | Mann-Whitney U test     | 0.3451         |
| Sex             | Frontal cortex      | % Abnormal cytoplasmic NUP98 | Mann-Whitney U test     | 0.2251         |
| Sex             | Occipital cortex    | % Abnormal nuclear NUP98     | Mann-Whitney U test     | 0.7780         |
| Sex             | Occipital cortex    | % Abnormal cytoplasmic NUP98 | Mann-Whitney U test     | 0.3950         |
| Sex             | NA                  | Diagnosis                    | Fisher's exact test     | 0.7889         |

PMI = Post-mortem interval

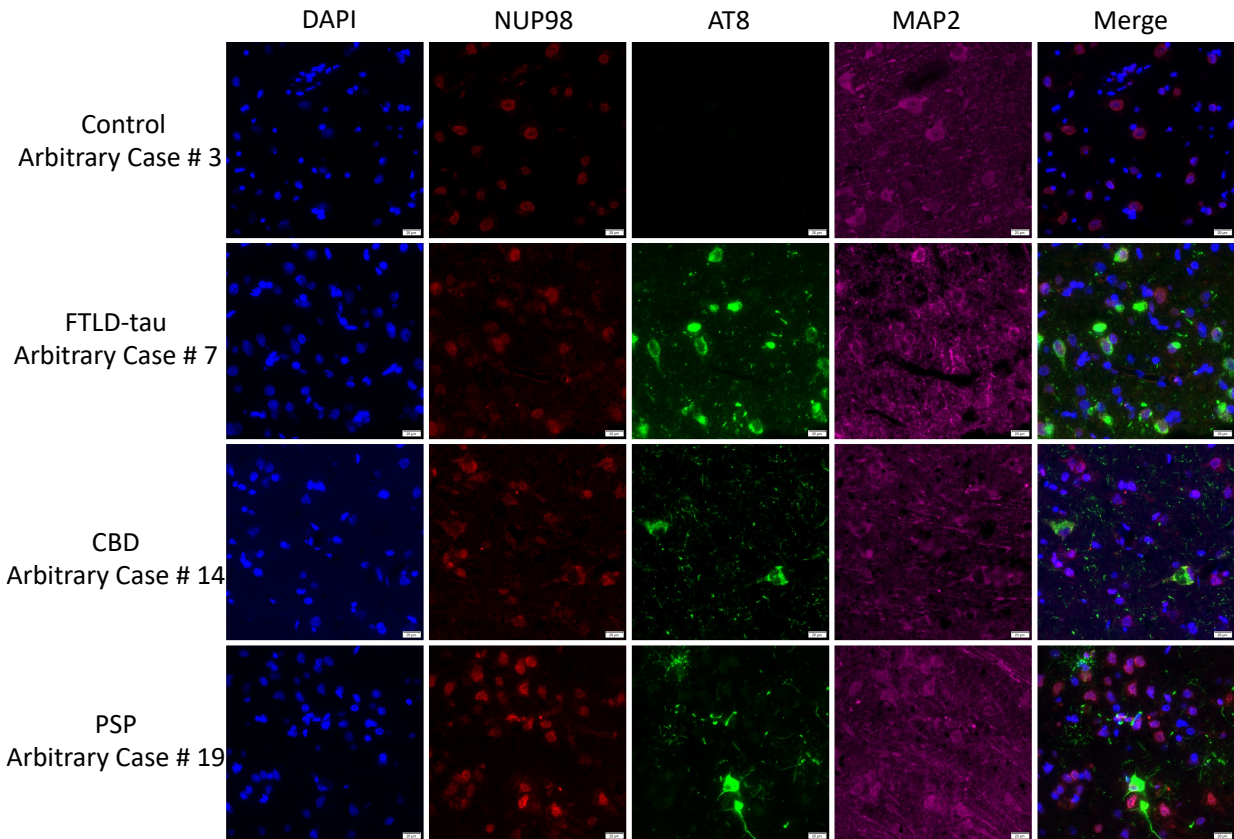

**Supplementary Figure 1. Virtual Slide Images of NUP98 in Primary Tauopathy Frontal Cortex.** Frontal cortex (Brodmann area 8,9) sections from neurologically normal controls, FTLD-tau, CBD, or PSP cases were stained for NUP98, phospho-tau (AT8), and MAP2 by immunofluorescence and nuclei counterstained with DAPI. The slides were imaged on the VS120 Virtual Slide Microscope. The arbitrary case numbers are indicated. Merged images demonstrate DAPI in blue, NUP98 in red, and AT8 in green. MAP2 is omitted from the merged images for the sake of clarity. Scale bar = 20  $\mu$ m.

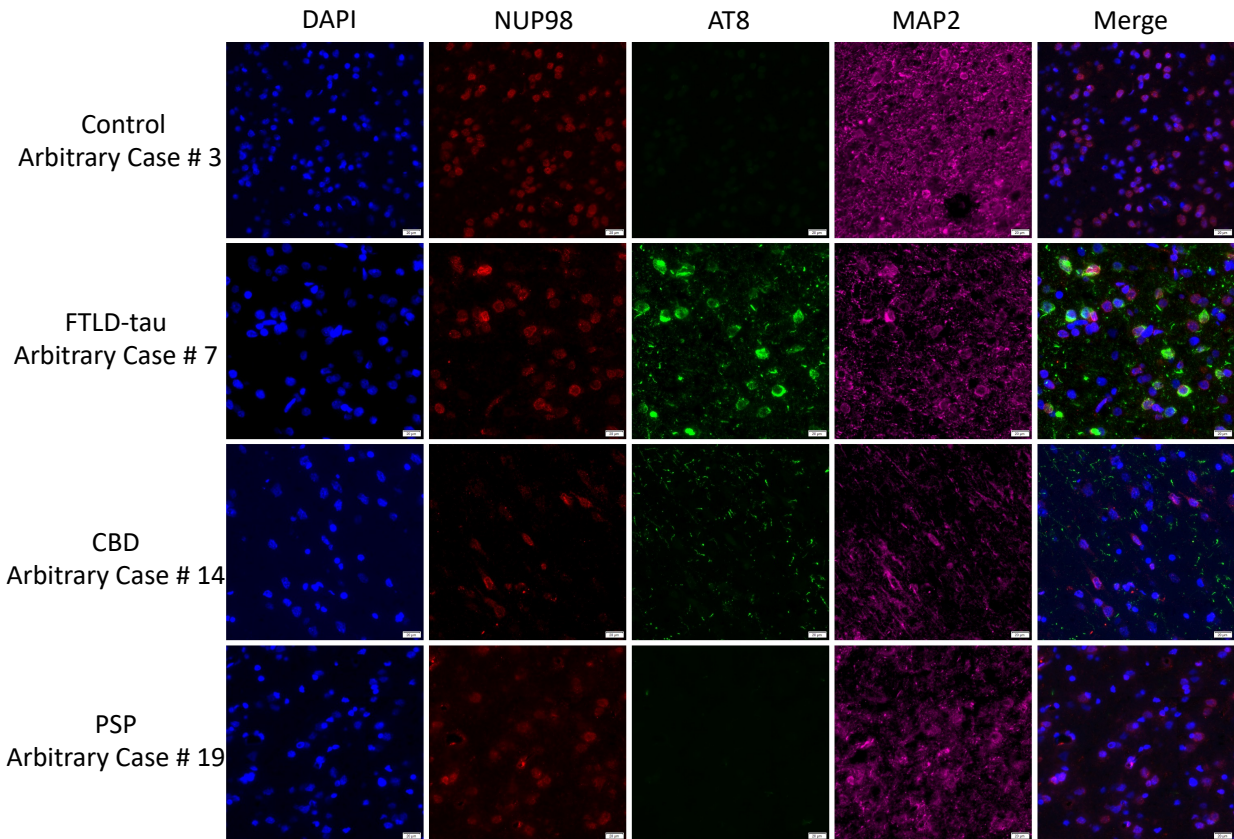

**Supplementary Figure 2. Virtual Slide Images of NUP98 in Primary Tauopathy Occipital Cortex.** Occipital cortex (Brodmann area 17) sections from neurologically normal controls, FTLD-tau, CBD, or PSP cases were stained for NUP98, phospho-tau (AT8), and MAP2 by immunofluorescence and nuclei counterstained with DAPI. The slides were imaged on the VS120 Virtual Slide Microscope. The arbitrary case numbers are indicated. Merged images demonstrate DAPI in blue, NUP98 in red, and AT8 in green. MAP2 is omitted from the merged images for the sake of clarity. Scale bar = 20  $\mu$ m.
